# Supplementary material
Source: Springer Nature journal article supplement (https://www.springermedizin.de/resource/supplementary/12884_2013_1250_MOESM2_ESM.pdf/9459186)
Supplement: MOESM2 [file 9459186]

## **Aceh Province Health Office (PHO)**

- Permission for data collection in the Aceh Province granted
- Researcher collected neonatal mortality data from 23 districts in Aceh Province

*Random sampling was used to determine 8 districts as the initial study sites based on criteria identified (Table 1)*

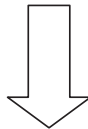

## **8 selected District Health Office (DHO)**

- Address of neonates who died with LBW(1000 -2499grams) were identified from record book for year 2010-2012

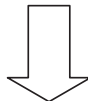

## **PUSKESMAS (sub district)**

- follow up the cases identified in DHO to *Puskesmas* to form a list of cases who met criteria
- controls identified from *Pukesmas* from a list of controls who met criteria
- Researcher determined the number of samples (case and control) for each sub district by proportion

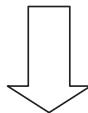

## **Village**

- data collection (questionnaire filled up) at identified home address after consent taken

Consecutive sampling technique was used for selecting cases and controls in each district until required sample size obtained
